# Supplementary material for: Predicting six-month mortality of patients with traumatic brain injury: usefulness of common intensive care severity scores
Source: PubMed Central journal article supplement (PMC4056363; doi:10.1186/cc13814), 2014-04-03
Supplement: cc13814-S1.pdf [file cc13814-S1.pdf]

## ADDITIONAL FILE 1 - SCORING SYSTEM EQUATIONS

### Customized risk for 6-month mortality: $1/(1+e^{-\text{logit}})$

- APACHE II logit:  $-5.183 + \text{APACHE II score} * 0.193$
- SAPS II logit:  $-4.967 + \text{SAPS II score} * 0.092$
- SOFA logit:  $-2.341 + \text{SOFA day 1 score} * 0.209$
- Adjusted SOFA logit:  $-3.008 + \text{SOFA respiration points} * 0.031 + \text{SOFA coagulation points} * 0.486 + \text{SOFA liver points} * -0.038 + \text{SOFA cardiovascular points} * 0.044 + \text{SOFA renal points} * 0.361 + (1.633, \text{ if GCS 3-6}) + \text{age points (see below)}$ 
  - $<40 \rightarrow 0.0$
  - $40-49 \rightarrow 0.705$
  - $50-59 \rightarrow 0.711$
  - $60-69 \rightarrow 1.153$
  - $70-79 \rightarrow 1.454$
  - $\geq 80 \rightarrow 1.944$
- Reference logit:  $-2.530 + (1.701, \text{ if GCS 3-6}) + \text{age points (see below)}$ 
  - $<40 \rightarrow 0.0$
  - $40-49 \rightarrow 0.677$
  - $50-59 \rightarrow 0.740$
  - $60-69 \rightarrow 1.231$
  - $70-79 \rightarrow 1.425$
  - $\geq 80 \rightarrow 1.936$

### Customized risk for in-hospital mortality: $1/(1+e^{-\text{logit}})$

- APACHE II logit:  $-6.662 + \text{APACHE II score} * 0.216$
- SAPS II logit:  $-6.765 + \text{SAPS II score} * 0.109$
- SOFA logit:  $-3.459 + \text{SOFA day 1 score} * 0.258$
- Adjusted SOFA logit:  $-3.740 + \text{SOFA respiration points} * 0.046 + \text{SOFA coagulation points} * 0.310 + \text{SOFA liver points} * -0.154 + \text{SOFA cardiovascular points} * 0.136 + \text{SOFA renal points} * 0.392 + (2.267, \text{ if GCS 3-6}) + \text{age points (see below)}$ 
  - $<40 \rightarrow 0.0$
  - $40-49 \rightarrow 0.423$
  - $50-59 \rightarrow 0.304$
  - $60-69 \rightarrow 0.204$
  - $70-79 \rightarrow 0.165$
  - $\geq 80 \rightarrow 0.404$
- Reference logit:  $-3.135 + (2.380, \text{ if GCS 3-6}) + \text{age points (see below)}$ 
  - $<40 \rightarrow 0.0$

- 40-49 → 0.299
- 50-59 → 0.262
- 60-69 → 0.271
- 70-79 → 0.103
- $\geq 80$  → 0.318
